# Supplementary material for: All-inorganic copper-halide perovskites for large-Stokes shift and ten-nanosecond-emission scintillators
Source: Royal Society of Chemistry journal article supplement (doi:10.1039/d3tc03977c), 2024-01-01
Supplement: d3tc03977c1.pdf [file d3tc03977c1.pdf]

Electronic Supplementary Information (ESI) for

# All-inorganic copper-halide perovskites for large-stokes-shift and ten-nanosecond-emission scintillators

Tobias Haposan,<sup>a</sup> Arramel Arramel,<sup>\*b</sup> Pramitha Yuniar Diah Maulida,<sup>b</sup> Sri Hartati,<sup>b</sup> Afif Akmal Afkauni,<sup>b</sup> Muhammad Haris Mahyuddin,<sup>c,d</sup> Lei Zhang,<sup>e</sup> Dominik Kowal,<sup>f</sup> Marcin Eugeniusz Witkowski,<sup>g</sup> Konrad Jacek Drozdowski,<sup>g</sup> Michal Makowski,<sup>f</sup> Winicjusz Drozdowski,<sup>g</sup> Lina Jaya Diguna,<sup>\*a</sup> and Muhammad Danang Birowosuto,<sup>\*f</sup>

---

<sup>a</sup> Department of Renewable Energy Engineering, Universitas Prasetiya Mulya, Kavling Edutown I.1, Jl. BSD Raya Utama, Tangerang 15339, Indonesia. E-mail: lina.diguna@prasetiyamulya.ac.id

<sup>b</sup> Nano Center Indonesia, Jl. PUSPIPTEK, Tangerang Selatan 15314, Indonesia. E-mail: arramel@nano.or.id

<sup>c</sup> Quantum and Nano Technology Research Group, Institut Teknologi Bandung, Jl. Ganesha 10, Bandung 40132, Indonesia.

<sup>d</sup> Research Center for Nanoscience and Nanotechnology, Institut Teknologi Bandung, Jl. Ganesha 10, Bandung 40132, Indonesia.

<sup>e</sup> Department of Physics, National University of Singapore, 2 Science Drive 3, Singapore 117542, Singapore.

<sup>f</sup> Lukaszewicz Research Network-PORT Polish Center for Technology Development, Stablowicka 147, 54-066 Wrocław, Poland. E-mail: muhammad.birowosuto@port.lukasiewicz.gov.pl

<sup>g</sup> Institute of Physics, Faculty of Physics, Astronomy, and Informatics, Nicolaus Copernicus University in Torun, ul. Grudziadzka 5, 87-100 Torun, Poland.

## List of Figures

|    |                                                                                                                                                                                                                                                                                                                                                                                                                                                                                                                                                                                                                                                                                                                                                        |    |
|----|--------------------------------------------------------------------------------------------------------------------------------------------------------------------------------------------------------------------------------------------------------------------------------------------------------------------------------------------------------------------------------------------------------------------------------------------------------------------------------------------------------------------------------------------------------------------------------------------------------------------------------------------------------------------------------------------------------------------------------------------------------|----|
| 1  | The photograph of (a) $\text{CsCu}_2\text{I}_3$ , (b) $\text{Cs}_3\text{Cu}_2\text{I}_5$ , (c) $\text{Cs}_3\text{Cu}_2\text{I}_4\text{Br}$ , and (d) $\text{Cs}_3\text{Cu}_2\text{I}_3\text{Br}_2$ under 254 nm light. . . . .                                                                                                                                                                                                                                                                                                                                                                                                                                                                                                                         | 4  |
| 2  | SEM images of (a) $\text{CsCu}_2\text{I}_3$ , (b) $\text{Cs}_3\text{Cu}_2\text{I}_5$ , (c) $\text{Cs}_3\text{Cu}_2\text{I}_4\text{Br}$ , and (d) $\text{Cs}_3\text{Cu}_2\text{I}_3\text{Br}_2$ powder. . . . .                                                                                                                                                                                                                                                                                                                                                                                                                                                                                                                                         | 5  |
| 3  | Distribution of dimensions of the CHP clusters from the SEM images. (a) Illustration of $\text{CsCu}_2\text{I}_3$ with the length and width dimensions and its (b) distribution histograms of length (left) and width (right) dimensions. (c) Illustration of $\text{Cs}_3\text{Cu}_2\text{I}_5$ with the horizontal and vertical diameters and its (d) distribution histograms of horizontal (left) and vertical (right) diameters. For $\text{CsCu}_2\text{I}_3$ , it is apparent that the rod-like shape is common with approximately 7:1 ratio between length and width average. . . . .                                                                                                                                                           | 5  |
| 4  | (a) TEM, HRTEM, and fast-Fourier transform (FFT) image of $\text{CsCu}_2\text{I}_3$ nanocrystals after sonification and filtering with their (b) dimension distribution in length (left) and width (right). (c) TEM, HRTEM, and FFT image of $\text{Cs}_3\text{Cu}_2\text{I}_5$ nanocrystals with their (d) particle size distribution. (e) Energy dispersive X-ray spectroscopy (EDS) elemental mapping of Cs, Cu, and I in $\text{Cs}_3\text{Cu}_2\text{I}_5$ . . . . .                                                                                                                                                                                                                                                                              | 6  |
| 5  | Experimental (black circles), Rietveld refinement (black line), its difference (blue line), and Bragg positions of XRD pattern from (a) $\text{CsCu}_2\text{I}_3$ , (b) $\text{Cs}_3\text{Cu}_2\text{I}_5$ , (c) $\text{Cs}_3\text{Cu}_2\text{I}_4\text{Br}$ , and (d) $\text{Cs}_3\text{Cu}_2\text{I}_3\text{Br}_2$ , carried out inside Profex software package. <sup>1</sup> We note that the calculated CIFs for $\text{CsCu}_2\text{I}_3$ and $\text{Cs}_3\text{Cu}_2\text{I}_5$ were adapted from reference, <sup>2</sup> whereas for the case of $\text{Cs}_3\text{Cu}_2\text{I}_4\text{Br}$ and $\text{Cs}_3\text{Cu}_2\text{I}_3\text{Br}_2$ were determined based on the theoretical procedure outlined in the Experimental section. . . . . | 7  |
| 6  | FTIR spectra of the CHPs measured at room temperature. . . . .                                                                                                                                                                                                                                                                                                                                                                                                                                                                                                                                                                                                                                                                                         | 8  |
| 7  | Raman spectra of the CHPs at room temperature. . . . .                                                                                                                                                                                                                                                                                                                                                                                                                                                                                                                                                                                                                                                                                                 | 9  |
| 8  | Deconvoluted XPS spectra of the CHPs on the region of (a) Cs3d, (b) Cu2p, (c) I3d, and (d) Br3d. . . . .                                                                                                                                                                                                                                                                                                                                                                                                                                                                                                                                                                                                                                               | 10 |
| 9  | Absorption spectra and their fitting curves of (a) $\text{CsCu}_2\text{I}_3$ , (b) $\text{Cs}_3\text{Cu}_2\text{I}_5$ , (c) $\text{Cs}_3\text{Cu}_2\text{I}_4\text{Br}$ , and (d) $\text{Cs}_3\text{Cu}_2\text{I}_3\text{Br}_2$ , determined with the Elliot fit <sup>3</sup> method as explained in Eqs. S1 and S2. . . . .                                                                                                                                                                                                                                                                                                                                                                                                                           | 13 |
| 10 | Distribution of PL results, namely (a) integrated PL intensity, (b) PL peak positions, and (c) FWHM of the CHPs from multiple series of and experiments. . . . .                                                                                                                                                                                                                                                                                                                                                                                                                                                                                                                                                                                       | 13 |
| 11 | Glow curve fitting of (a) $\text{Cs}_3\text{Cu}_2\text{I}_5$ , (b) $\text{Cs}_3\text{Cu}_2\text{I}_4\text{Br}$ , and (c) $\text{Cs}_3\text{Cu}_2\text{I}_3\text{Br}_2$ with multiple Randal-Wilkins equation. <sup>4,5</sup> The parameters used for fitting are shown in the inset. . . . .                                                                                                                                                                                                                                                                                                                                                                                                                                                           | 15 |
| 12 | Fluorescence spectra of $\text{Cs}_3\text{Cu}_2\text{I}_5$ (black), $\text{Cs}_3\text{Cu}_2\text{I}_4\text{Br}$ (blue), $\text{Cs}_3\text{Cu}_2\text{I}_3\text{Br}_2$ (yellow), $\text{CsCu}_2\text{I}_3$ (purple), and $\text{CsPbBr}_3$ quantum dots (QDs) (dark green). . . . .                                                                                                                                                                                                                                                                                                                                                                                                                                                                     | 16 |
| 13 | Pulse height spectra of the CHPs, using a $^{137}\text{Cs}$ source. . . . .                                                                                                                                                                                                                                                                                                                                                                                                                                                                                                                                                                                                                                                                            | 17 |
| 14 | Visualisations of (a) 1D $\text{CsCu}_2\text{I}_3$ and (b) 0D $\text{Cs}_3\text{Cu}_2\text{I}_5$ crystal structure from structural files. <sup>2</sup> . . . . .                                                                                                                                                                                                                                                                                                                                                                                                                                                                                                                                                                                       | 19 |

## List of Tables

|   |                                                                                                                                                      |    |
|---|------------------------------------------------------------------------------------------------------------------------------------------------------|----|
| 1 | Lattice parameters of the copper halide perovskites (CHPs) obtained by Rietveld refinement of experimental XRD patterns at room temperature. . . . . | 7  |
| 2 | A summary of the XPS deconvoluted spectra FWHM and area evaluation. For XPS analyses, the CasaXPS software package was used. <sup>6</sup> . . . . .  | 11 |
| 3 | Summary of optical properties of representative perovskites (all measured at RT)                                                                     | 14 |

|   |                                                                                                                                                                                                                |    |
|---|----------------------------------------------------------------------------------------------------------------------------------------------------------------------------------------------------------------|----|
| 4 | Parameter of the TL peak fitting, where $T_{max}$ is the temperature at which the maximum of peak occurs, $E$ is the depth of trap, $n_0$ is the trap concentration, and $\sigma$ is frequency factor. . . . . | 15 |
| 5 | Summary of scintillation properties of representative perovskites (all measured at RT) . . . . .                                                                                                               | 18 |
| 6 | Bond length and bond angle between metal to its certain halide $CsCu_2I_3$ and $Cs_3Cu_2I_5$ CHP as obtained from CIFs. . . . .                                                                                | 19 |

After-grinding powder under 254 nm light

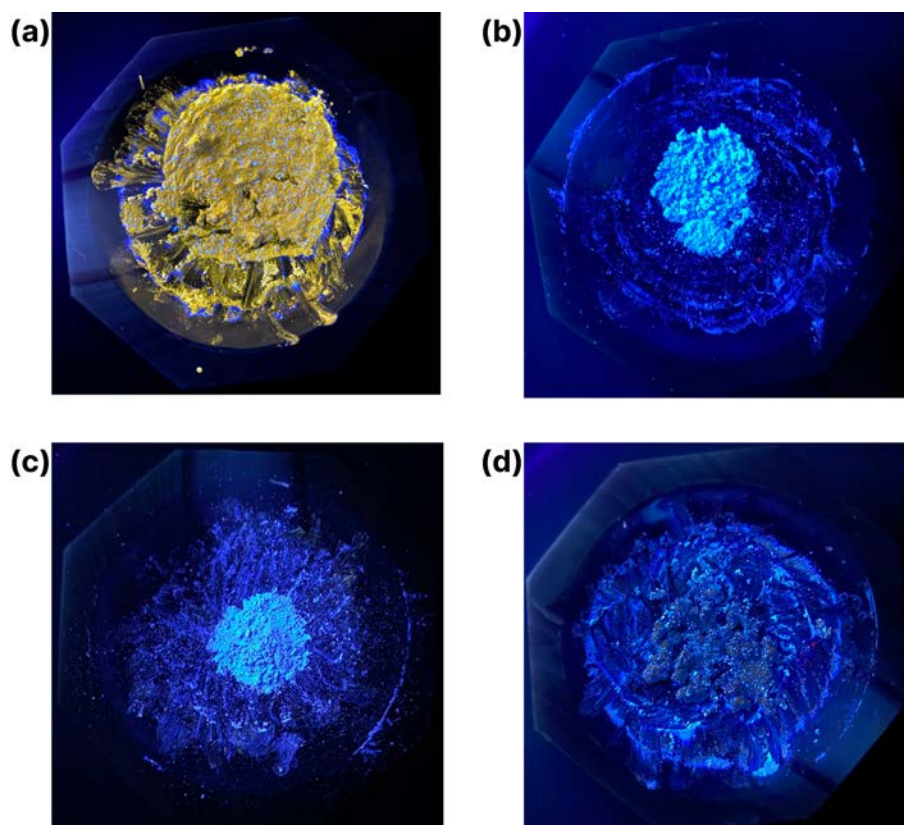

**Figure S1:** The photograph of (a)  $\text{CsCu}_2\text{I}_3$ , (b)  $\text{Cs}_3\text{Cu}_2\text{I}_5$ , (c)  $\text{Cs}_3\text{Cu}_2\text{I}_4\text{Br}$ , and (d)  $\text{Cs}_3\text{Cu}_2\text{I}_3\text{Br}_2$  under 254 nm light.

## SEM and TEM

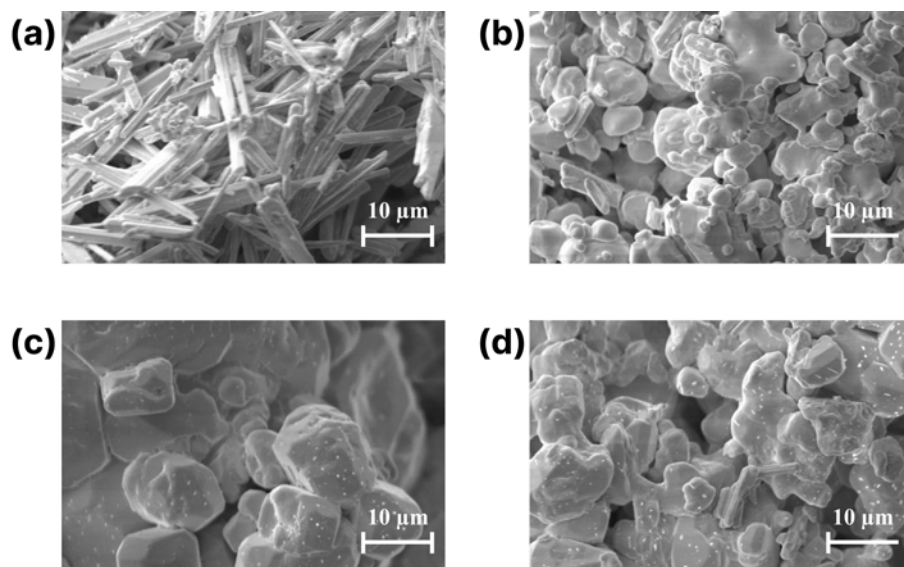

**Figure S2:** SEM images of (a)  $\text{CsCu}_2\text{I}_3$ , (b)  $\text{Cs}_3\text{Cu}_2\text{I}_5$ , (c)  $\text{Cs}_3\text{Cu}_2\text{I}_4\text{Br}$ , and (d)  $\text{Cs}_3\text{Cu}_2\text{I}_3\text{Br}_2$  powder.

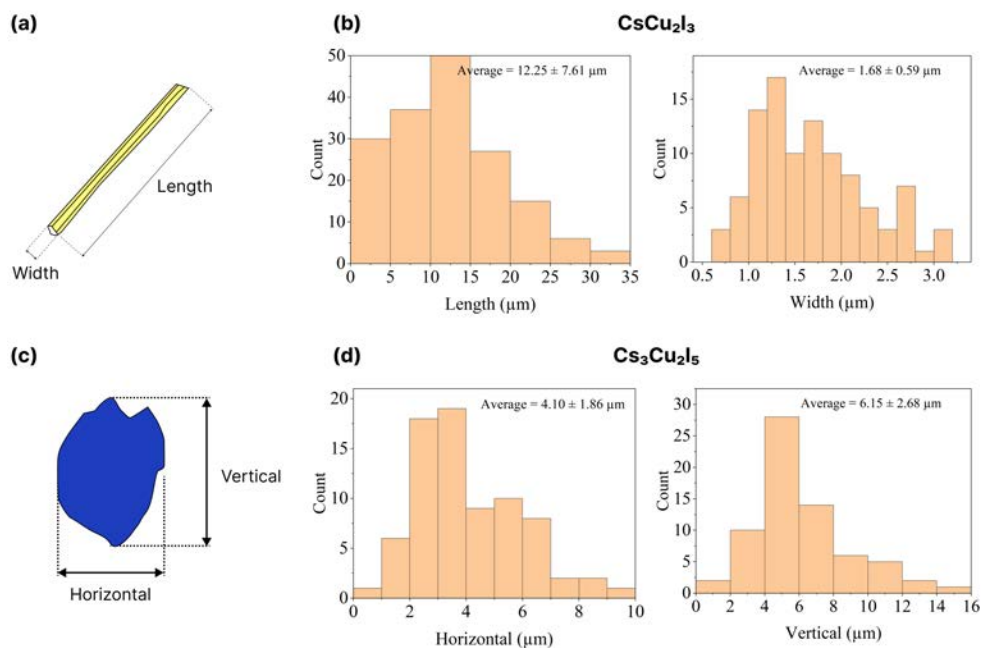

**Figure S3:** Distribution of dimensions of the CHP clusters from the SEM images. (a) Illustration of  $\text{CsCu}_2\text{I}_3$  with the length and width dimensions and its (b) distribution histograms of length (left) and width (right) dimensions. (c) Illustration of  $\text{Cs}_3\text{Cu}_2\text{I}_5$  with the horizontal and vertical diameters and its (d) distribution histograms of horizontal (left) and vertical (right) diameters. For  $\text{CsCu}_2\text{I}_3$ , it is apparent that the rod-like shape is common with approximately 7:1 ratio between length and width average.

To unveil the morphological state at greater magnifications of the  $\text{CsCu}_2\text{I}_3$  and  $\text{Cs}_3\text{Cu}_2\text{I}_5$ , we carried out transmission electron microscopy (TEM) and high-resolution TEM (HRTEM) as depicted in Figure S4. As explained in the Experimental section, the samples were prepared by sonification in a dispersed solution, hence separating the aggregated clustered powder form into individual nanocrystals. TEM and HRTEM of  $\text{CsCu}_2\text{I}_3$  are depicted in Figure S4a, with the size

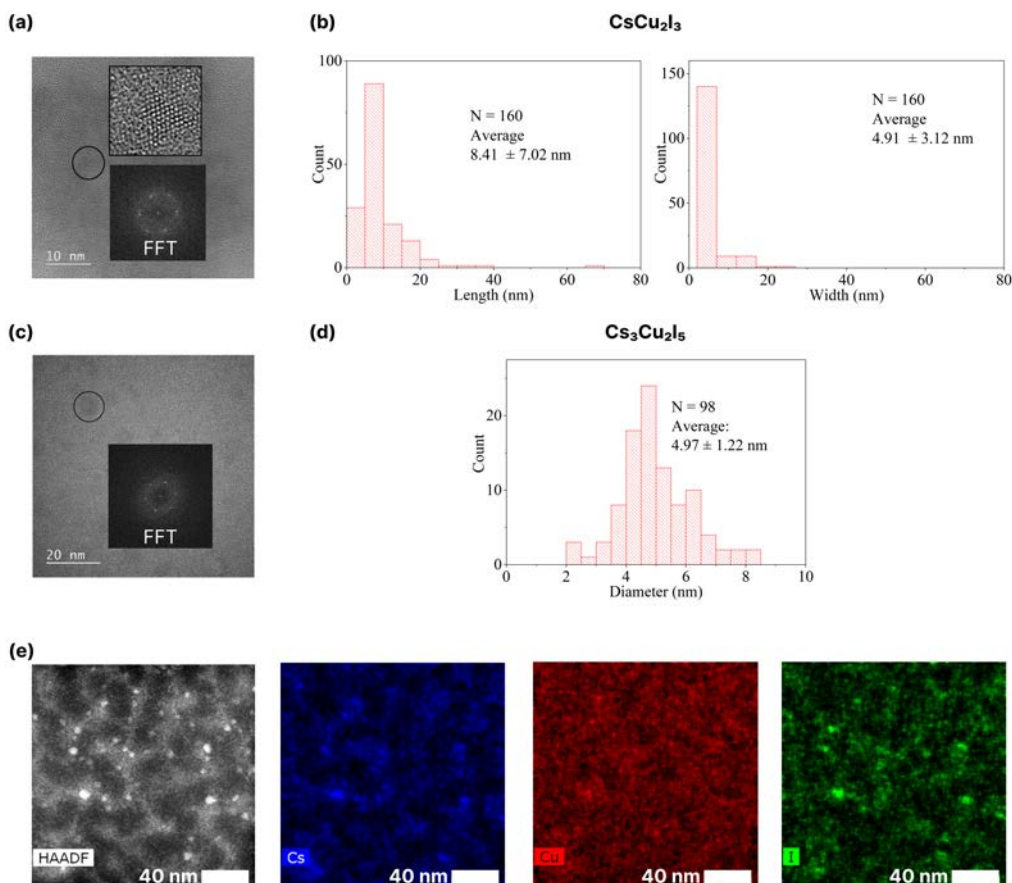

**Figure S4:** (a) TEM, HRTEM, and fast-Fourier transform (FFT) image of CsCu<sub>2</sub>I<sub>3</sub> nanocrystals after sonification and filtering with their (b) dimension distribution in length (left) and width (right). (c) TEM, HRTEM, and FFT image of Cs<sub>3</sub>Cu<sub>2</sub>I<sub>5</sub> nanocrystals with their (d) particle size distribution. (e) Energy dispersive X-ray spectroscopy (EDS) elemental mapping of Cs, Cu, and I in Cs<sub>3</sub>Cu<sub>2</sub>I<sub>5</sub>.

distribution in Figure S4b indicating the consistent rod-like shape as found in SEM. Similarly, the TEM of Cs<sub>3</sub>Cu<sub>2</sub>I<sub>5</sub> with its particle size distribution are depicted in Figures S4c and S4d, respectively. Furthermore, the distorted hexagons obtained from the of HRTEM indicate the formation of an orthorhombic structure. This finding provides insight into producing CHP nanocrystals through mechanochemistry, as an alternative to the hot-injection method.

## Rietveld refinement

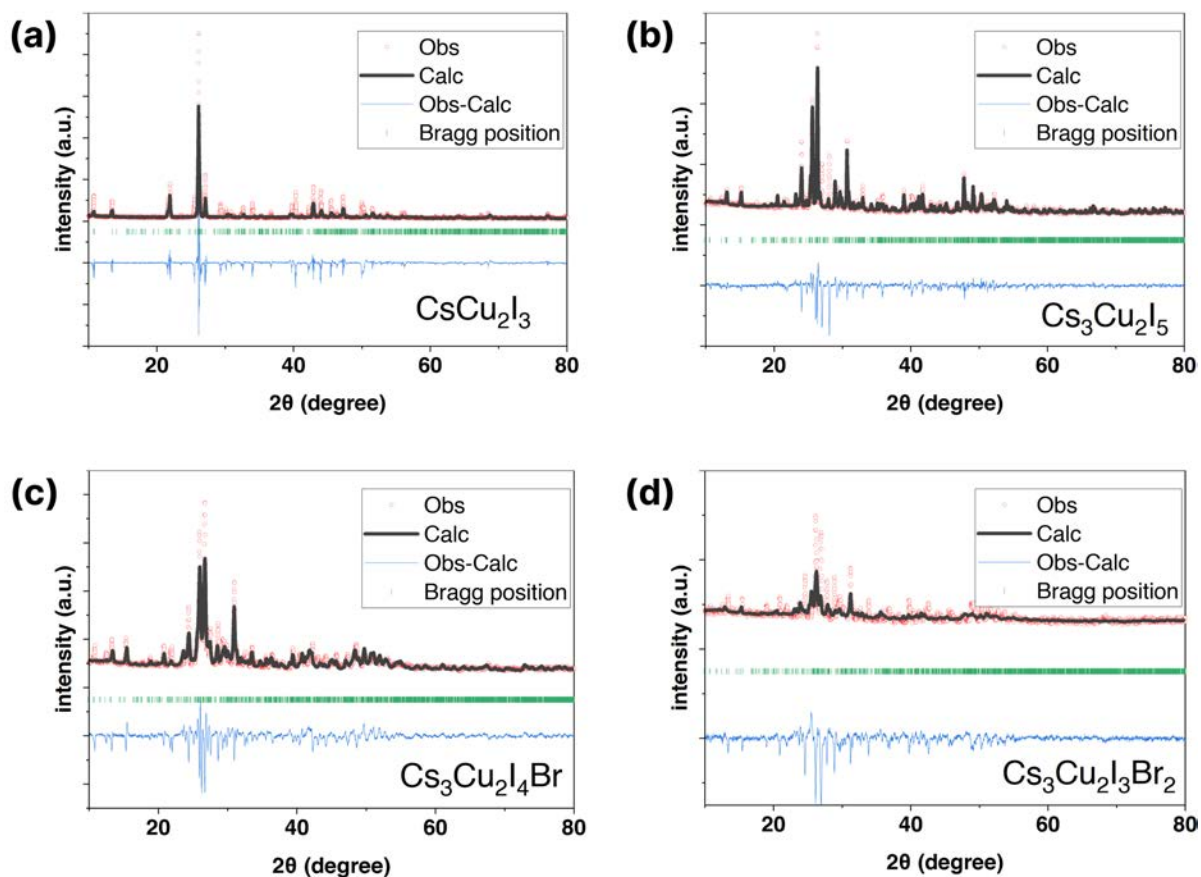

**Figure S5:** Experimental (black circles), Rietveld refinement (black line), its difference (blue line), and Bragg positions of XRD pattern from (a)  $\text{CsCu}_2\text{I}_3$ , (b)  $\text{Cs}_3\text{Cu}_2\text{I}_5$ , (c)  $\text{Cs}_3\text{Cu}_2\text{I}_4\text{Br}$ , and (d)  $\text{Cs}_3\text{Cu}_2\text{I}_3\text{Br}_2$ , carried out inside Profex software package.<sup>1</sup> We note that the calculated CIFs for  $\text{CsCu}_2\text{I}_3$  and  $\text{Cs}_3\text{Cu}_2\text{I}_5$  were adapted from reference,<sup>2</sup> whereas for the case of  $\text{Cs}_3\text{Cu}_2\text{I}_4\text{Br}$  and  $\text{Cs}_3\text{Cu}_2\text{I}_3\text{Br}_2$  were determined based on the theoretical procedure outlined in the Experimental section.

**Table S1:** Lattice parameters of the copper halide perovskites (CHPs) obtained by Rietveld refinement of experimental XRD patterns at room temperature.

| Compounds                                     | Space group | $a$ (Å)             | $b$ (Å)              | $c$ (Å)             | $V$ (Å <sup>3</sup> ) | $R_{wp}$ (%) | $\chi^2$ |
|-----------------------------------------------|-------------|---------------------|----------------------|---------------------|-----------------------|--------------|----------|
| $\text{CsCu}_2\text{I}_3$                     | $Cmcm$      | $10.439 \pm 0.001$  | $13.154 \pm 0.0002$  | $6.284 \pm 0.00007$ | $865.204 \pm 0.841$   | 26.12        | 15.29    |
| $\text{Cs}_3\text{Cu}_2\text{I}_5$            | $Pnma$      | $10.289 \pm 0.001$  | $11.669 \pm 0.00008$ | $14.428 \pm 0.001$  | $1698.750 \pm 0.046$  | 12.16        | 9.51     |
| $\text{Cs}_3\text{Cu}_2\text{I}_4\text{Br}$   | $Pnma$      | $10.125 \pm 0.001$  | $11.648 \pm 0.0002$  | $14.399 \pm 0.001$  | $1679.527 \pm 0.047$  | 13.11        | 17.54    |
| $\text{Cs}_3\text{Cu}_2\text{I}_3\text{Br}_2$ | $Pnma$      | $10.154 \pm 0.0006$ | $11.368 \pm 0.001$   | $14.257 \pm 0.001$  | $1637.956 \pm 0.617$  | 12.45        | 12.37    |

## Fourier-transformed infrared spectroscopy

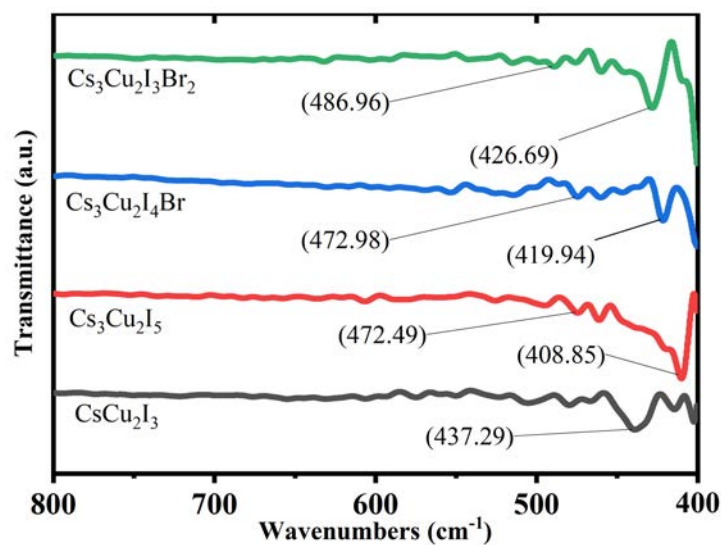

**Figure S6:** FTIR spectra of the CHPs measured at room temperature.

Fingerprint FTIR spectra, as shown in Figure S6, show that the addition of Br results in a blue shift, as a dip at wavenumber  $\sim 408.85 \text{ cm}^{-1}$  in Cs<sub>3</sub>Cu<sub>2</sub>I<sub>5</sub> shifts to  $\sim 419.94 \text{ cm}^{-1}$  and  $\sim 426.69 \text{ cm}^{-1}$  in Cs<sub>3</sub>Cu<sub>2</sub>I<sub>4</sub>Br and Cs<sub>3</sub>Cu<sub>2</sub>I<sub>3</sub>Br<sub>2</sub> respectively. A similar blue shift is also shown by a dip at wavenumber  $\sim 472.49 \text{ cm}^{-1}$  in Cs<sub>3</sub>Cu<sub>2</sub>I<sub>5</sub> shifts to  $\sim 472.98 \text{ cm}^{-1}$  and  $\sim 486.96 \text{ cm}^{-1}$  in Cs<sub>3</sub>Cu<sub>2</sub>I<sub>4</sub>Br and Cs<sub>3</sub>Cu<sub>2</sub>I<sub>3</sub>Br<sub>2</sub> respectively. A similar trend is also suggested by changing the dimensionality from 0D to 1D. The observed spectral bands may be attributed to the infrared-active stretching vibrations of metal-halogen bonds in inorganic complexes, positioned within the wavenumber range of 500-200 cm<sup>-1</sup>.<sup>7</sup>



## Raman spectra

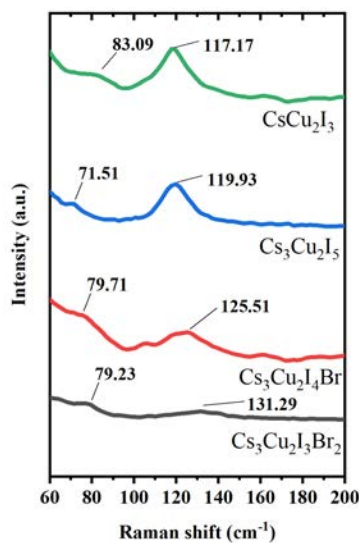

**Figure S7:** Raman spectra of the CHPs at room temperature.

Figure S7 shows Raman spectra of the CHPs. The main peak observed at  $\sim 120 \text{ cm}^{-1}$  for all samples is attributed to I-Cu-I vibration mode.<sup>8</sup> and It tends to shift to higher wavenumber, as well as the dimensionality is reduced from 1D structure in  $\text{CsCu}_2\text{I}_3$  to 0D structure in  $\text{Cs}_3\text{Cu}_2\text{I}_5$  and when the I is substituted with Br. We suspect that the observed phenomena may be caused by the phonon confinement effect.<sup>9</sup> The shifting to a higher wavenumber as the increasing increase of Br species is due to a minute change of lattice-phonon coupling in the inorganic networks. This interaction is cause caused by the lowering of unit cell dimensions when incorporating the smaller Br atoms in the lattice and in turn causes stiffening of the lattice, thus a shift to higher frequency occurs.<sup>10,11</sup> Furthermore, the signal (weak protrusion) at  $\sim 80 \text{ cm}^{-1}$  can be tentatively corresponded to the two-phonon difference between the longitudinal-optic and transverse-optic modes.<sup>12</sup>

## X-ray photoelectron spectroscopy

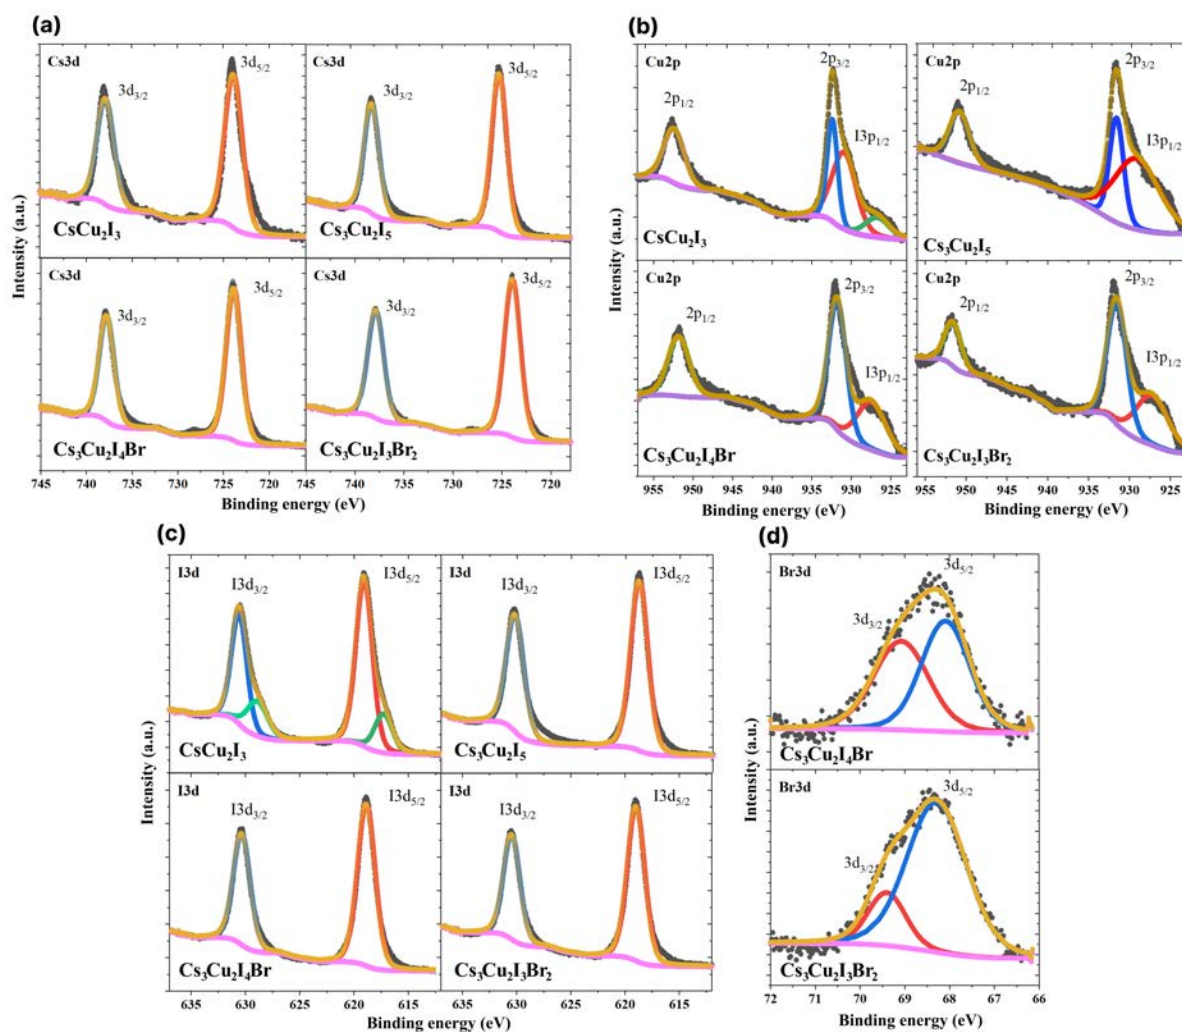

**Figure S8:** Deconvoluted XPS spectra of the CHPs on the region of (a) Cs3d, (b) Cu2p, (c) I3d, and (d) Br3d.

We performed a series of high-resolution XPS measurements on the CHPs to determine the surface composition of the CHPs depicted in Figure S8a-d. In all Cs 3d peaks ( Figure S8a), two symmetrical peaks are observed located at the binding energy of  $\sim 738$  and  $\sim 724$  eV for Cs orbital  $3d_{3/2}$  and  $3d_{5/2}$ , respectively for all CHPs.<sup>13</sup> The core level spectra of Cu2p in 1D CsCu<sub>2</sub>I<sub>3</sub> and 0D Cs<sub>3</sub>Cu<sub>2</sub>I<sub>5</sub> CHPs ( Figure S8b) share similar two major peaks located at  $\sim 951$  and  $\sim 932$  eV, which can be assigned to the Cu  $2p_{1/2}$  and Cu  $2p_{3/2}$ , respectively.<sup>14</sup> The absence of satellite peak at 934 eV suggests that the Cu adopts a monovalent Cu<sup>+</sup> configuration.<sup>15,16</sup> The fitted XPS spectra of Cu2p<sub>3/2</sub> region in 1D Cs<sub>3</sub>Cu<sub>2</sub>I<sub>5</sub> consisted of three deconvoluted peaks. The blue line is centered at 932 eV corresponds to the Cu  $2p_{3/2}$  in a +1 oxidation state,<sup>15</sup> whereas the black line located at 931 eV corresponds to I  $3p_{1/2}$ ,<sup>17,18</sup> and the small shoulder peak in green located in 927 eV corresponds to Cs MNN electron.<sup>19</sup> Interestingly, the fitted high resolution XPS spectra for the other three samples show Cu  $2p_{3/2}$  comprised of only two peaks. On all CHPs, the distance between two peaks on the Cu 2p survey region remains consistent at  $\sim 20$  eV. Survey of I 3d orbital ( Figure S8c) shows a symmetric peak located at  $\sim 630$  and  $\sim 619$  eV for I  $3d_{3/2}$  and I  $3d_{5/2}$ , respectively for Cs<sub>3</sub>Cu<sub>2</sub>I<sub>5</sub>, Cs<sub>3</sub>Cu<sub>2</sub>I<sub>4</sub>Br, and Cs<sub>3</sub>Cu<sub>2</sub>I<sub>3</sub>Br<sub>2</sub>.<sup>18</sup> Meanwhile the fitted XPS spectra for CsCu<sub>2</sub>I<sub>3</sub> shows different peak compositions than the other three CHPs. For 1D CsCu<sub>2</sub>I<sub>3</sub>, in addition to the usual peaks of I  $3d_{3/2}$  and I  $3d_{5/2}$ ,

shoulder peaks were found in the lower binding energy of the main peak located at  $\sim 629$  and  $\sim 617$  eV may be attributed to different I chemical environment such as Cs—I for each of the I 3d XPS peak.<sup>13</sup> In  $\text{Cs}_3\text{Cu}_2\text{I}_4\text{Br}$  and  $\text{Cs}_3\text{Cu}_2\text{I}_3\text{Br}_2$ , peaks appear at  $\sim 69$  and  $\sim 68$  eV, confirming the presence of Br in the respective CHPs.

**Table S2:** A summary of the XPS deconvoluted spectra FWHM and area evaluation. For XPS analyses, the CasaXPS software package was used.<sup>6</sup>

| CHP                                           | Orbital | FWHM (eV) | Area      |
|-----------------------------------------------|---------|-----------|-----------|
| $\text{CsCu}_2\text{I}_3$                     | Cs3d    | 2.41      | 63394.09  |
|                                               | Cu2p    | 3.24      | 105461.60 |
|                                               | I3d     | 2.49      | 151412.07 |
| $\text{Cs}_3\text{Cu}_2\text{I}_5$            | Cs3d    | 2.21      | 93238.77  |
|                                               | Cu2p    | 4.20      | 122942.10 |
|                                               | I3d     | 2.31      | 116023.58 |
| $\text{Cs}_3\text{Cu}_2\text{I}_4\text{Br}$   | Cs3d    | 2.45      | 61005.14  |
|                                               | Cu2p    | 4.49      | 57959.72  |
|                                               | I3d     | 2.46      | 57357.07  |
|                                               | Br3d    | 3.60      | 2914.25   |
| $\text{Cs}_3\text{Cu}_2\text{I}_3\text{Br}_2$ | Cs3d    | 2.30      | 99229.70  |
|                                               | Cu2p    | 3.81      | 88263.33  |
|                                               | I3d     | 2.28      | 77197.88  |
|                                               | Br3d    | 3.73      | 15232.57  |

## Absorption spectra

Experimental band gap was obtained with Elliot fitting.<sup>3</sup> In principle, the contributions to the absorption coefficient ( $\alpha$ ) can be defined from free carriers (continuum) ( $\alpha_c$ ) and excitons ( $\alpha_{ex}$ ), as shown in Eq. S1.  $\alpha_{ex}$  can be obtained with Eq. S2, where the frequency dependence of  $P_{cv}$  is approximated as a constant and related to the interband transition matrix element,  $\hbar\omega$  is the photon energy,  $\theta(\hbar\omega - E_g)$  is the Heaviside step function,  $x$  is defined as  $\sqrt{R_{ex}/(\hbar\omega - E_g)}$ , and  $\delta$  denotes a delta function.  $R_{ex}$  is exciton Rydberg energy;  $n$  is the principle quantum number. The fits are shown in Figure S9.

$$\alpha(\hbar\omega) = \alpha_c + \alpha_{ex} \quad (\text{S1})$$

$$\alpha(\hbar\omega) = P_{cv} \left[ \theta(\hbar\omega - E_g) \cdot \left( \frac{\pi e^{\pi x}}{\sinh(\pi x)} \right) + R_{ex} \sum_{n=1}^{\infty} \frac{4\pi}{n^3} \cdot \delta\left(\hbar\omega - E_g + \frac{R_{ex}}{n^2}\right) \right] \quad (\text{S2})$$

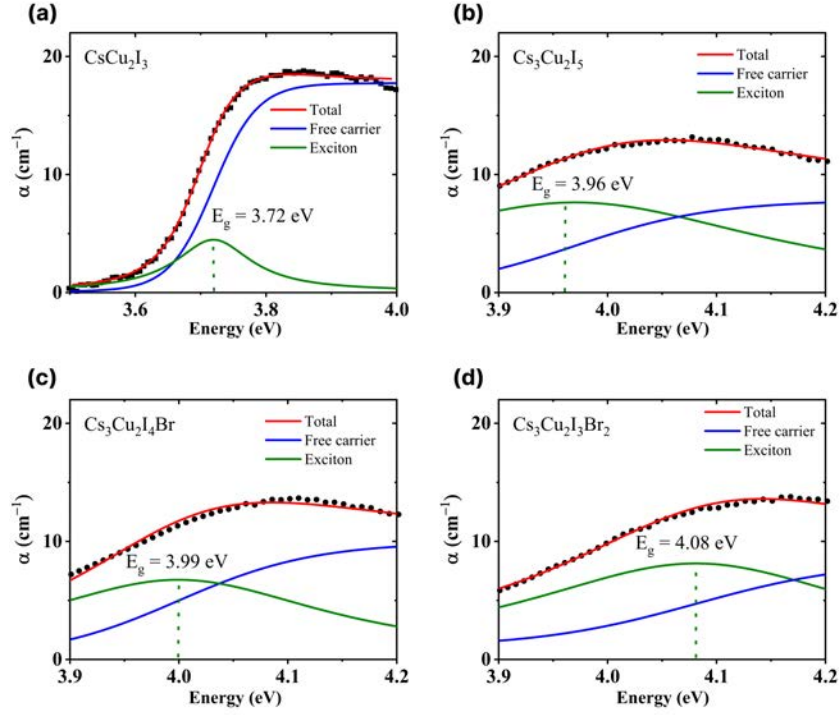

**Figure S9:** Absorption spectra and their fitting curves of (a)  $\text{CsCu}_2\text{I}_3$ , (b)  $\text{Cs}_3\text{Cu}_2\text{I}_5$ , (c)  $\text{Cs}_3\text{Cu}_2\text{I}_4\text{Br}$ , and (d)  $\text{Cs}_3\text{Cu}_2\text{I}_3\text{Br}_2$ , determined with the Elliot fit<sup>3</sup> method as explained in Eqs. S1 and S2.

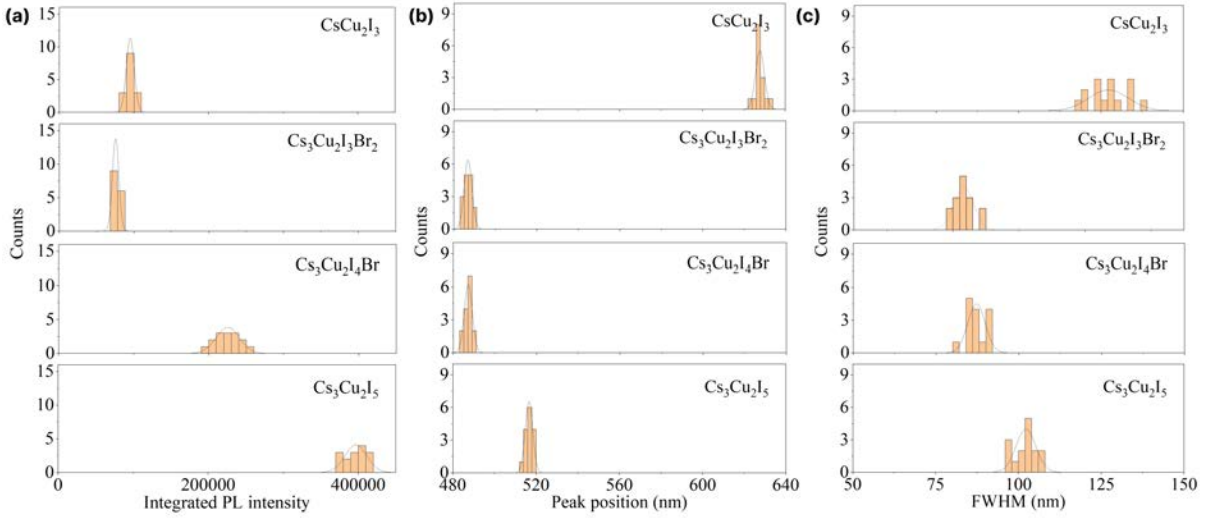

**Figure S10:** Distribution of PL results, namely (a) integrated PL intensity, (b) PL peak positions, and (c) FWHM of the CHPs from multiple series of and experiments.

# Summary of optical properties of Pb-based perovskites

**Table S3:** Summary of optical properties of representative perovskites (all measured at RT)

| Perovskite                                                        | Absorption peak (nm) | PL peak (nm)  | FWHM (nm)     | Stokes shift (nm) | Ref.               |
|-------------------------------------------------------------------|----------------------|---------------|---------------|-------------------|--------------------|
| CsPbI <sub>3</sub> nanocrystals                                   | 664                  | 667           | 36            | 3                 | <a href="#">20</a> |
| CsPbBr <sub>3</sub> nanocrystals                                  | 480                  | 517           | 33            | 37                | <a href="#">20</a> |
| Cs <sub>4</sub> PbI <sub>6</sub> single crystal                   | 341                  | 547           | 200           | 206               | <a href="#">21</a> |
| Dual-phase Cs <sub>4</sub> PbBr <sub>6</sub> /CsPbBr <sub>3</sub> | 510                  | 518           | 30            | 8                 | <a href="#">22</a> |
| Dual-phase CsPbBr <sub>3</sub> -CsPb <sub>2</sub> Br <sub>5</sub> | 346                  | 522           | 21.2          | 176               | <a href="#">23</a> |
| CsPbBr <sub>3</sub> nanosheets                                    | 460                  | 515           | 21            | 55                | <a href="#">24</a> |
| CsPbBr <sub>3</sub> nanowires in anodised aluminum oxide          | ~530                 | 530           | 30            | ~0                | <a href="#">25</a> |
| CsCu <sub>2</sub> I <sub>3</sub>                                  | 323.27               | 628.87 ± 3.18 | 127.31 ± 6.05 | 294.49 ± 2.81     | This work          |
| Cs <sub>3</sub> Cu <sub>2</sub> I <sub>5</sub>                    | 303.08               | 518.54 ± 2.73 | 102.26 ± 3.01 | 203.54 ± 4.35     |                    |
| Cs <sub>3</sub> Cu <sub>2</sub> I <sub>4</sub> Br                 | 301.74               | 487.36 ± 2.45 | 87.18 ± 2.66  | 119.31 ± 21.92    |                    |
| Cs <sub>3</sub> Cu <sub>2</sub> I <sub>3</sub> Br <sub>2</sub>    | 298.38               | 485.25 ± 2.43 | 83.26 ± 3.00  | 176.08 ± 3.00     |                    |

## Glow curve fitting

For the quantitative analysis, we deconvolute the glow curves into  $k$  glow peaks, based on the classic Randall-Wilkins equation:<sup>4,5</sup>

$$I_{TL} = \sum_{i=1}^k n_{0_i} V \sigma_i \exp\left(-\frac{E_i}{k_B T}\right) \exp\left(-\frac{\sigma_i}{\beta} \int_{T_0}^T \exp\left(-\frac{E_i}{k_B T'}\right) dT'\right) \quad (\text{S3})$$

where  $T$  is the temperature,  $\beta$  is the heating rate,  $k_B$  is the Boltzmann constant,  $n_{0_i}$  is the initial trap concentration,  $V$  is the crystal volume,  $E_i$  is the trap depth, and  $\sigma_i$  is the frequency factor of each component. The unit-less  $n_{0_i} V$  or  $A_i$ , shown in Figure S11, is used to compare afterglow of different crystals.

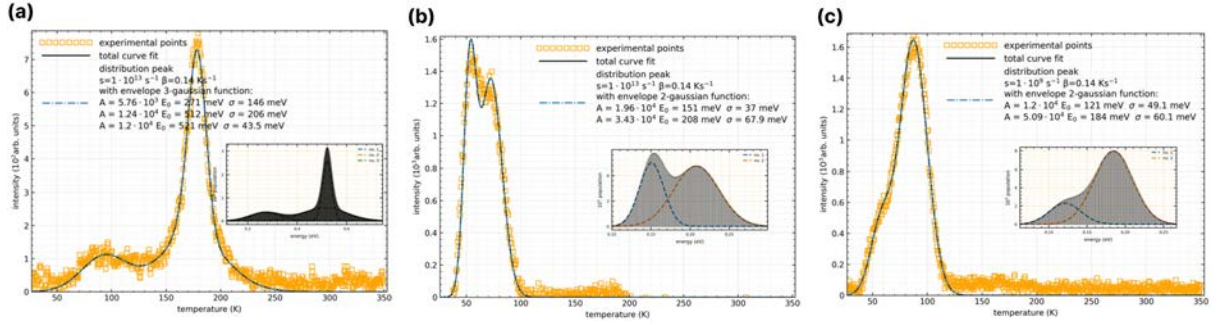

**Figure S11:** Glow curve fitting of (a)  $\text{Cs}_3\text{Cu}_2\text{I}_5$ , (b)  $\text{Cs}_3\text{Cu}_2\text{I}_4\text{Br}$ , and (c)  $\text{Cs}_3\text{Cu}_2\text{I}_3\text{Br}_2$  with multiple Randall-Wilkins equation.<sup>4,5</sup> The parameters used for fitting are shown in the inset.

**Table S4:** Parameter of the TL peak fitting, where  $T_{max}$  is the temperature at which the maximum of peak occurs,  $E$  is the depth of trap,  $n_0$  is the trap concentration, and  $\sigma$  is frequency factor.

| CHP                                           | $T_{max}$ (K) | $E$ (meV)    | $n_0$ (a.u.)                  | $\sigma$ (meV) |
|-----------------------------------------------|---------------|--------------|-------------------------------|----------------|
| $\text{CsCu}_2\text{I}_3$                     |               |              | No trap                       |                |
| $\text{Cs}_3\text{Cu}_2\text{I}_5$            | 95            | $271 \pm 27$ | $(5.76 \pm 0.58) \times 10^3$ | $146 \pm 15$   |
|                                               | 162           | $512 \pm 26$ | $(1.24 \pm 0.06) \times 10^4$ | $206 \pm 10$   |
| $\text{Cs}_3\text{Cu}_2\text{I}_4\text{Br}$   | 175           | $521 \pm 26$ | $(1.20 \pm 0.06) \times 10^4$ | $43.5 \pm 2$   |
|                                               | 54            | $151 \pm 15$ | $(1.96 \pm 0.20) \times 10^4$ | $37 \pm 7$     |
| $\text{Cs}_3\text{Cu}_2\text{I}_3\text{Br}_2$ | 72            | $208 \pm 21$ | $(3.43 \pm 0.34) \times 10^4$ | $67.9 \pm 7$   |
|                                               | 61            | $121 \pm 18$ | $(1.20 \pm 0.20) \times 10^4$ | $49.1 \pm 7$   |
|                                               | 84            | $184 \pm 18$ | $(5.09 \pm 0.34) \times 10^4$ | $60.1 \pm 6$   |

## Quantum yield

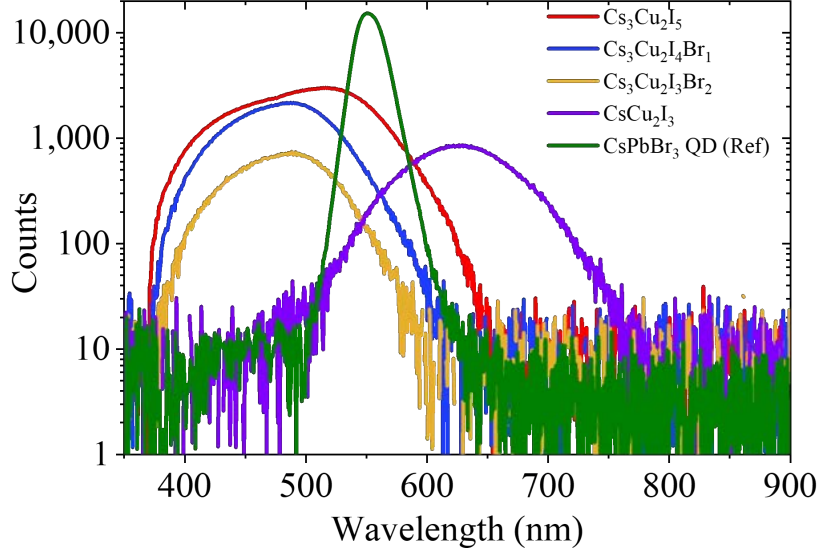

**Figure S12:** Fluorescence spectra of  $\text{Cs}_3\text{Cu}_2\text{I}_5$  (black),  $\text{Cs}_3\text{Cu}_2\text{I}_4\text{Br}_1$  (blue),  $\text{Cs}_3\text{Cu}_2\text{I}_3\text{Br}_2$  (yellow),  $\text{CsCu}_2\text{I}_3$  (purple), and  $\text{CsPbBr}_3$  quantum dots (QDs) (dark green).

For reference purposes, we employed  $\text{CsPbBr}_3$  quantum dots (QDs) integrated into the resin without requiring additional purification, as outlined in previous work.<sup>26</sup> Notably, information from a private communication<sup>27</sup> indicates  $Q_r$  to be 64%,  $n_r$  as 2.3, and  $A_r$  as 0.85. In order to calculate the QY of the sample ( $Q_s$ ):

$$Q_s = Q_r \left( \frac{A_r}{A} \right) \left( \frac{E_s}{E_r} \right) \left( \frac{n_s}{n_r} \right)^2 \quad (\text{S4})$$

where  $Q$  is the fluorescence quantum yield,  $n$  is the refractive index of the QDs/crystals,  $A$  is the absorbance of the QDs/crystals, and  $E$  is the integrated fluorescence intensity of the emitted light. The subscript “s” and “r” refer to the reference and unknown fluorophore, respectively. The experimental results can be found in Figure S12.

Through the conducted analyses, the QY (expressed in %) have been ascertained as displayed in Table 3 in the manuscript. The QY of  $\text{Cs}_3\text{Cu}_2\text{I}_5$ , accounting for 47%, aligns with the 51% reported in Zhao *et al.*<sup>28</sup> Meanwhile, the reduced QY of  $\text{CsCu}_2\text{I}_3$  resembles that found in reference.<sup>19</sup> The observed trend of decreasing QY with increasing bromide concentration in the mixed bromide and iodide samples can be anticipated due to the reduction in refractive index.<sup>29</sup>



## Pulse-height spectra

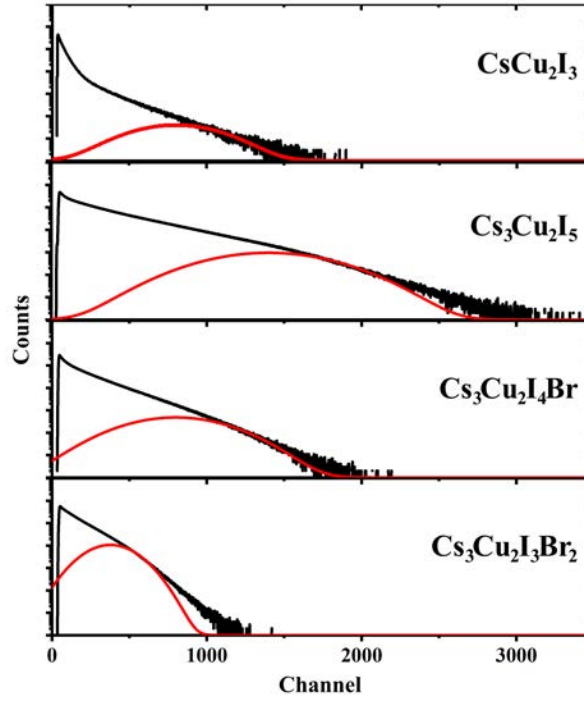

**Figure S13:** Pulse height spectra of the CHPs, using a  $^{137}\text{Cs}$  source.

Herein, an additional pulse height spectra measured with 661.7 keV gamma-ray source as shown in Figure S13. From the QY, the maximum theoretical value of LY is determined based on equation S5, where  $E_g^{exp}$  is experimental band gap, S is the electron-hole transfer efficiency, and QY is the quantum yield.

$$LY^{calc} = \left( \frac{10^3}{E_g^{exp} \cdot 2.3} \right) \cdot S \cdot QY \quad (\text{S5})$$

## Scintillation properties of Pb-based perovskites

**Table S5:** Summary of scintillation properties of representative perovskites (all measured at RT)

| Perovskite                                                        | Light yield (photons/MeV) | Decay time (ns) | Ref.               |
|-------------------------------------------------------------------|---------------------------|-----------------|--------------------|
| CsPbI <sub>3</sub> nanocrystals                                   | 1,900                     | 1.10            | <a href="#">20</a> |
| CsPbBr <sub>3</sub> nanocrystals                                  | 24,000                    | 5.97            | <a href="#">20</a> |
| CsPbBr <sub>3</sub> single crystals                               | ~1,200                    | 0.39, 7.0       | <a href="#">21</a> |
| CsPbBr <sub>3</sub> nanosheets                                    | ~21,000                   | 1-10            | <a href="#">30</a> |
| Cs <sub>4</sub> PbI <sub>6</sub> single crystals                  | ~5,000                    | 0.95, 6.86      | <a href="#">21</a> |
| Dual-phase Cs <sub>4</sub> PbBr <sub>6</sub> /CsPbBr <sub>3</sub> | ~6,000                    | 3               | <a href="#">22</a> |
| Dual-phase CsPbBr <sub>3</sub> -CsPb <sub>2</sub> Br <sub>5</sub> | 19,200                    | 3.38            | <a href="#">23</a> |
| CsCu <sub>2</sub> I <sub>3</sub>                                  | 12.5 ± 0.5                | 124.88 ± 1.63   | This work          |
| Cs <sub>3</sub> Cu <sub>2</sub> I <sub>5</sub>                    | 16.5 ± 3.5                | 840.82 ± 3.65   |                    |
| Cs <sub>3</sub> Cu <sub>2</sub> I <sub>4</sub> Br                 | 11.0 ± 1.0                | 684.13 ± 22.72  |                    |
| Cs <sub>3</sub> Cu <sub>2</sub> I <sub>3</sub> Br <sub>2</sub>    | 5.5 ± 0.5                 | 604.45 ± 46.15  |                    |

## Geometric consideration

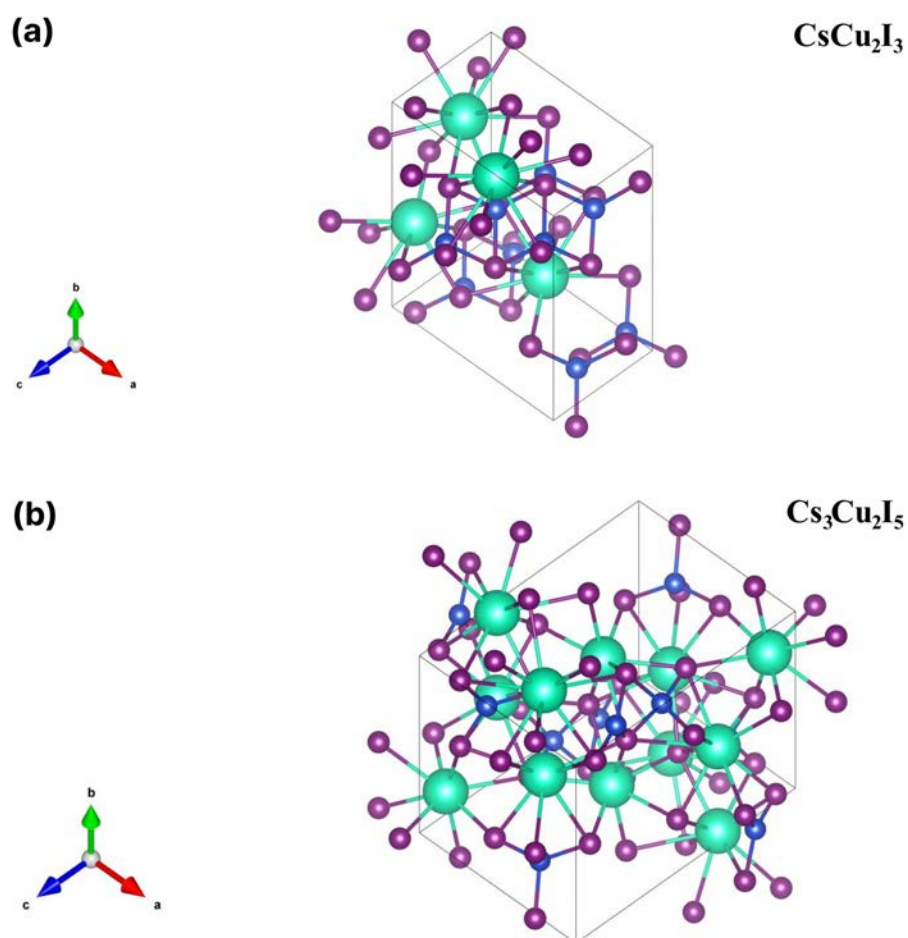

**Figure S14:** Visualisations of (a) 1D  $\text{CsCu}_2\text{I}_3$  and (b) 0D  $\text{Cs}_3\text{Cu}_2\text{I}_5$  crystal structure from structural files.<sup>2</sup>

**Table S6:** Bond length and bond angle between metal to its certain halide  $\text{CsCu}_2\text{I}_3$  and  $\text{Cs}_3\text{Cu}_2\text{I}_5$  CHP as obtained from CIFs.

| CHP                                | Cu1-I1 (Å) | Cu1-I2 (Å) | I1-Cu1-I1 (deg) | I1-Cu1-I2 (deg) |
|------------------------------------|------------|------------|-----------------|-----------------|
| $\text{CsCu}_2\text{I}_3$          | 2.61       | 2.69       | 116.42          | 108.89          |
| $\text{Cs}_3\text{Cu}_2\text{I}_5$ | 2.56       | 2.52       | 117.07          | 121.45          |

## References

- [1] N. Doebelin and R. Kleeberg, *J. Appl. Cryst.*, 2015, **48**, 1573–1580.
- [2] G. K. Grandhi, N. S. M. Viswanath, H. B. Cho, J. H. Han, S. M. Kim, S. Choi and W. B. Im, *J. Phys. Chem. Lett.*, 2020, **11**, 7723–7729.
- [3] R. J. Elliott, *Phys. Rev.*, 1957, **108**, 1384–1389.
- [4] J. T. Randall and M. H. F. W. Wilkins, *Proc. R. Soc. Lond. A*, 1945, **184**, 365–389.
- [5] M. D. Birowosuto, D. Cortecchia, W. Drozdowski, K. Brylew, W. Lachmanski, A. Bruno and C. Soci, *Sci. Rep.*, 2016, **6**, 37254.
- [6] N. Fairley, V. Fernandez, M. Richard-Plouet, C. Guillot-Deudon, J. Walton, E. Smith, D. Flahaut, M. Greiner, M. Biesinger, S. Tougaard, D. Morgan and J. Baltrusaitis, *Appl. Surf. Sci.*, 2021, **5**, 100112.
- [7] R. Clark, *Spectrochim. Acta*, 1965, **21**, 955–963.
- [8] Z. Guo, J. Li, Y. Gao, J. Cheng, W. Zhang, R. Pan, R. Chen and T. He, *J. Mater. Chem. C*, 2020, **8**, 16923–16929.
- [9] A. K. Arora, M. Rajalakshmi, T. R. Ravindran and V. Sivasubramanian, *J Raman Spectrosc.*, 2007, **38**, 604–617.
- [10] F. H. Naqvi, S. B. Junaid and J.-H. Ko, *Materials*, 2023, **16**, 3986.
- [11] Y. Chen, A. Mahata, A. D. Lubio, M. Cinquino, A. Coriolano, L. Skokan, Y. Jeong, L. Razzari, L. De Marco, A. Ruediger, F. De Angelis, S. Colella and E. Orgiu, *Adv. Opt. Mater.*, 2022, **10**, 2100439.
- [12] J. Serrano, M. Cardona, T. M. Ritter, B. A. Weinstein, A. Rubio and C. T. Lin, *Phys. Rev. B*, 2002, **66**, 245202.
- [13] S. Daliran, M. Khajeh, A. R. Oveisi, J. Alberro and H. García, *ACS Appl. Mater. Interfaces*, 2022, **14**, 36515–36526.
- [14] C.-X. Li, S.-B. Cho, D.-H. Kim and I.-K. Park, *Chem. Mater.*, 2022, **34**, 6921–6932.
- [15] H. Liu, J. Xie, P. Liu and B. Dai, *Catalysts*, 2016, **6**, 120.
- [16] Y. Lu, G. Li, S. Fu, S. Fang and L. Li, *ACS Omega*, 2021, **6**, 544–552.
- [17] H. Zhang, L. Yang, H. Chen, W. Ma, R. Wang and G. Cao, *Mater. Chem. Front.*, 2022, **6**, 1647–1657.
- [18] Z. Li, Z. Li, Z. Shi and X. Fang, *Adv. Funct. Mater.*, 2020, **30**, 2002634.
- [19] C.-Y. Chen, Y.-I. Lin, P.-T. Lai, H.-C. Lin, G.-H. Tan, H.-W. Lin and R. D. Schaller, *Adv. Opt. Mater.*, 2022, **10**, 2200005.
- [20] F. Maddalena, A. Xie, X. Y. Chin, R. Begum, M. E. Witkowski, M. Makowski, B. Mahler, W. Drozdowski, S. V. Springham, R. S. Rawat, N. Mathews, C. Dujardin, M. D. Birowosuto and C. Dang, *J. Phys. Chem. C*, 2021, **125**, 14082–14088.
- [21] Y. Li, L. Chen, R. Gao, B. Liu, W. Zheng, Y. Zhu, J. Ruan, X. Ouyang and Q. Xu, *ACS Appl. Mater. Interfaces*, 2022, **14**, 1489–1495.

- [22] F. Cao, D. Yu, W. Ma, X. Xu, B. Cai, Y. M. Yang, S. Liu, L. He, Y. Ke, S. Lan, K.-L. Choy and H. Zeng, *ACS Nano*, 2020, **14**, 5183–5193.
- [23] V. Naresh, S. Singh, H. Soh, J. Lee and N. Lee, *Mater. Today Nano*, 2023, 100364.
- [24] Z. Wang, R. Sun, N. Liu, H. Fan, X. Hu, D. Shen, Y. Zhang and H. Liu, *Nano Res.*, 2022, **15**, 2399–2404.
- [25] Z. Zhang, H. Dierks, N. Lamers, C. Sun, K. Nováková, C. Hetherington, I. G. Scheblykin and J. Wallentin, *ACS Appl. Nano Mater.*, 2022, **5**, 881–889.
- [26] Nanolumi, *Advanced Luminescent Materials & Integrative Solutions*, <https://www.nanolumi.com/>.
- [27] E. Chua, *Personal communications*, 2021.
- [28] X. Zhao, T. Jin, W. Gao, G. Niu, J. Zhu, B. Song, J. Luo, W. Pan, H. Wu, M. Zhang, X. He, L. Fu, Z. Li, H. Zhao and J. Tang, *Adv. Opt. Mater.*, 2021, **9**, 2101194.
- [29] M. L. Ali, M. Khan, M. A. Al Asad and M. Z. Rahaman, *Heliyon*, 2023, **9**, e18816.
- [30] Y. Zhang, R. Sun, X. Ou, K. Fu, Q. Chen, Y. Ding, L.-J. Xu, L. Liu, Y. Han, A. V. Malko, X. Liu, H. Yang, O. M. Bakr, H. Liu and O. F. Mohammed, *ACS Nano*, 2019, **13**, 2520–2525.
